# Supplementary material for: Shotgun metagenomic profiling of bacterial microbiomes, metagenome-assembled genomes and antimicrobial resistance in respiratory and blood samples from Gambian children with pneumonia
Source: Research Square preprint supplement (doi:10.21203/rs.3.rs-8724320/v1), 2026-04-08
Supplement: Supplementary file 1 [file 3b7cf779a468bab219542cdd.pdf]

## Supplementary Information

Table S1: Specimen types analysed in the cohort

| Specimen                                       | Severe case | Very severe case | Total (%) |
|------------------------------------------------|-------------|------------------|-----------|
| Nasopharyngeal swab                            | 15          | 14               | 29(41)    |
| Lung aspirate                                  | 4           | 3                | 7(10)     |
| Blood                                          | 0           | 11               | 11(15)    |
| Induced sputum                                 | 0           | 12               | 12(17)    |
| Combined nasopharyngeal and oropharyngeal swab | 0           | 12               | 12(17)    |
| Total                                          | 19          | 52               | 71 (100)  |

Table S2: Serotypes and sequence types of *S. pneumoniae* and *H. influenzae* high-quality MAGs

| Specie                          | MAG                   | Serotype                         | ST         | Participant | Specimen |
|---------------------------------|-----------------------|----------------------------------|------------|-------------|----------|
| <i>Streptococcus pneumoniae</i> | MAG4                  | 19A                              | 10676      | 3           | LA       |
|                                 | MAG6                  | 19A                              | 847        | 4           | NP-OP    |
|                                 | MAG9                  | Possible non capsular            | Unassigned | 6           | NPS      |
|                                 | MAG11                 | Possible non capsular            | 3081       | 7           | LA       |
|                                 | MAG14                 | 6A/6B                            | 5549       | 10          | Blood    |
|                                 | MAG16                 | 19A                              | 847        | 11          | LA       |
|                                 | MAG20                 | 6E                               | Unassigned | 17          | Blood    |
|                                 | MAG23                 | 19A                              | 847        | 20          | Blood    |
|                                 | MAG27                 | 19F                              | 925        | 30          | Blood    |
|                                 | MAG32                 | 19A                              | Unassigned | 30          | NPS      |
| MAG34                           | Possible non capsular | 3334                             | 34         | NPS         |          |
| <i>Haemophilus influenzae</i>   | MAG7                  | Nontypeable <i>H. influenzae</i> | 2442       | 5           | IS       |
|                                 | MAG10                 | Nontypeable <i>H. influenzae</i> | 503        | 6           | LA       |
|                                 | MAG13                 | Nontypeable <i>H. influenzae</i> | Unassigned | 7           | LA       |
|                                 | MAG15                 | Nontypeable <i>H. influenzae</i> | Unassigned | 10          | NP-OP    |
|                                 | MAG17                 | Nontypeable <i>H. influenzae</i> | Unassigned | 11          | LA       |
|                                 | MAG18                 | Nontypeable <i>H. influenzae</i> | 165        | 13          | LA       |
|                                 | MAG19                 | Nontypeable <i>H. influenzae</i> | 481        | 15          | Blood    |
|                                 | MAG24                 | Nontypeable <i>H. influenzae</i> | 2442       | 21          | Blood    |
|                                 | MAG29                 | Nontypeable <i>H. influenzae</i> | Unassigned | 30          | Blood    |
|                                 | MAG31                 | Nontypeable <i>H. influenzae</i> | Unassigned | 30          | NPS      |

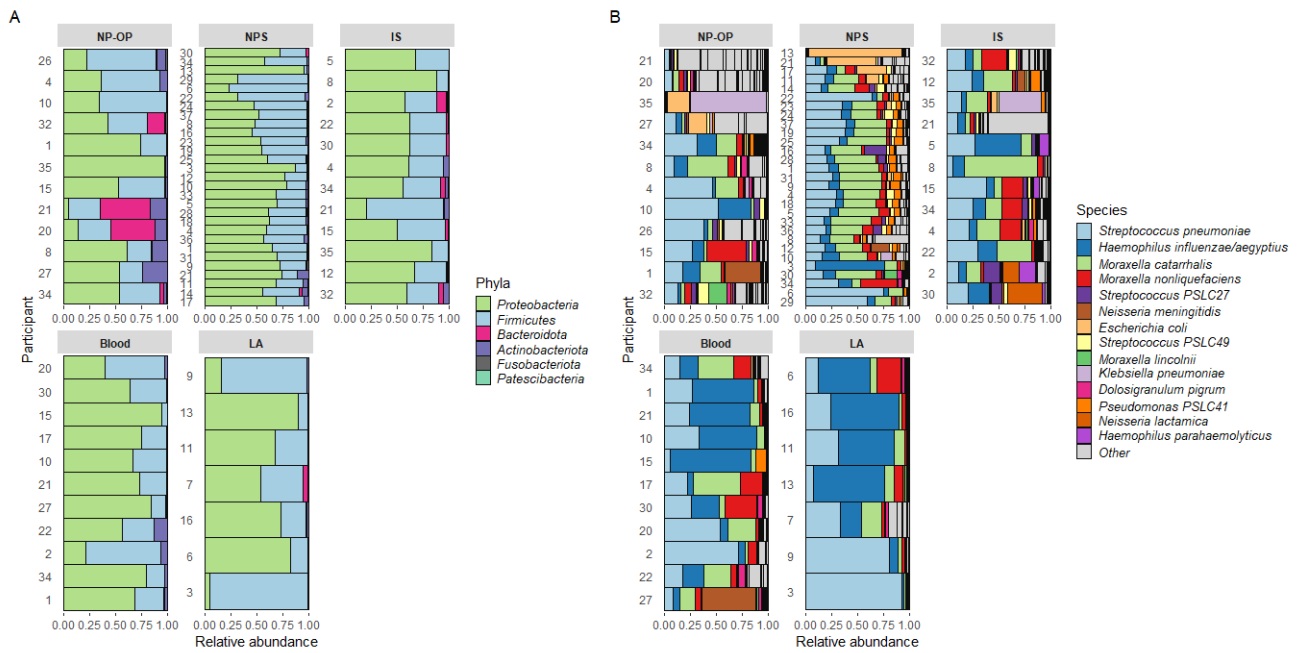

Figure S1: Barplots of the relative abundances of bacteria DNA at the phylum (A) and species (B) level in individual samples. The bars which represent individual samples are arranged on the Y axis based on similarity in profiles.

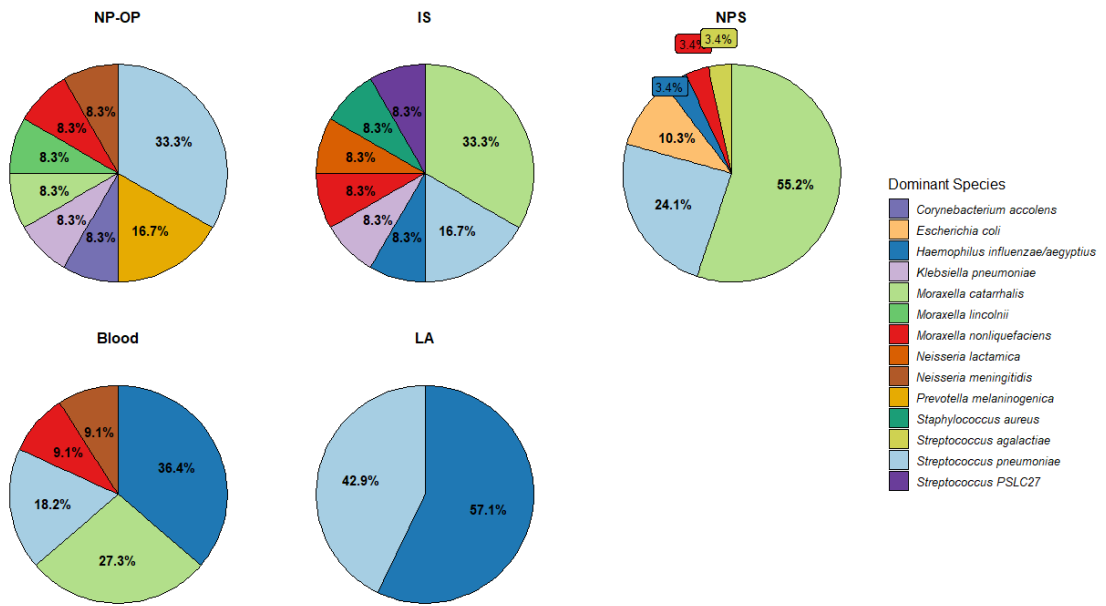

Figure S2: Distribution of dominant bacterial species across specimen type. A species was defined as dominant if it had the highest relative abundance in a sample. Each sector in the pie represents the percentage of the number of samples in which that species was dominant relative to the number of samples analysed for that specimen type.

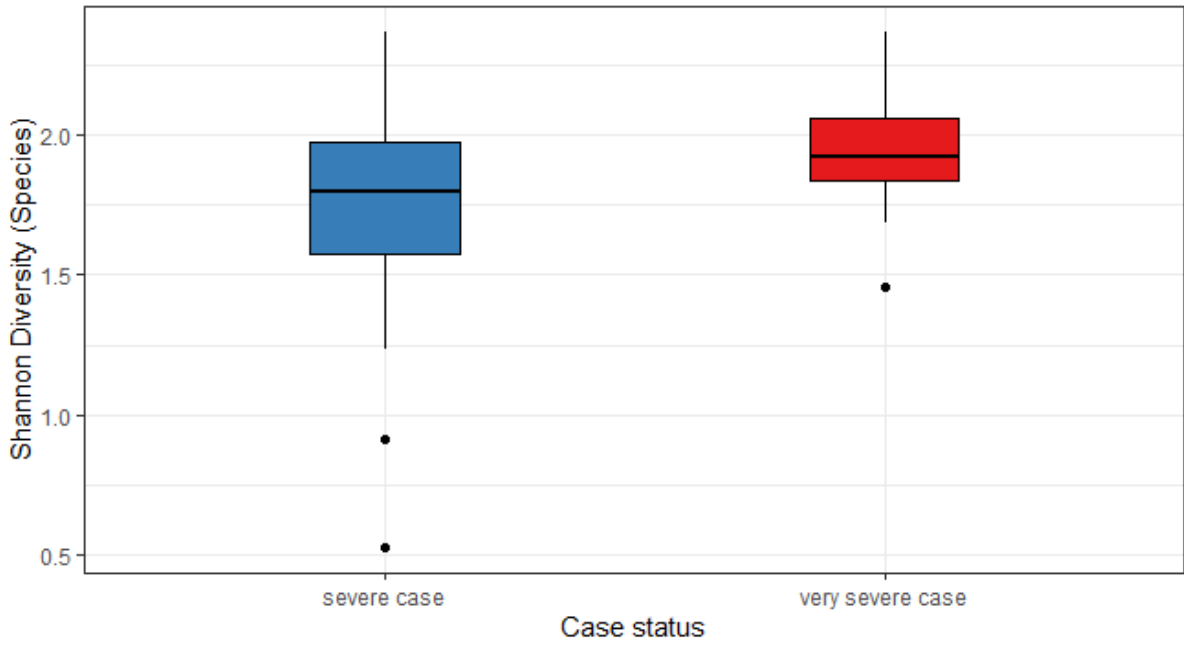

Figure S3: Shannon diversity of the nasopharynx microbial community by case type. Median Shannon diversity values are represented by horizontal lines within each boxplot while the upper and lower ranges of each boxplot represent the 75% and 25% quartiles.

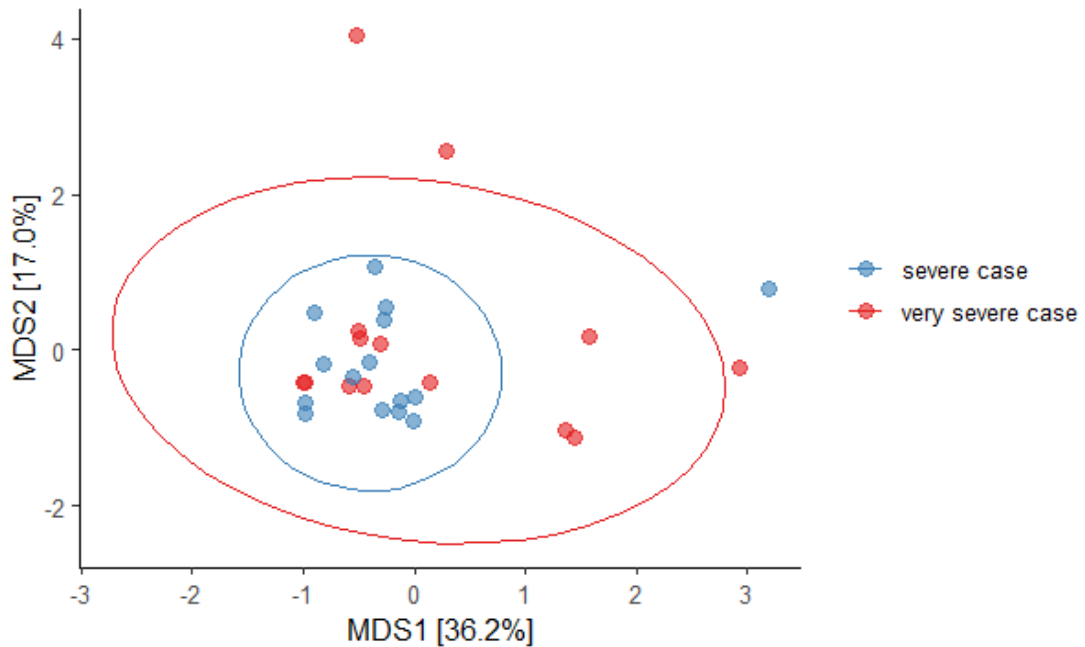

Figure S4: Principal Coordinates Analysis (PCoA) plot based on Aitchison distance of severe cases and very severe cases.

Table S3: Accession numbers of the samples used in this paper

| Accession    | Sample name | Specimen                               | Bioproject accession |
|--------------|-------------|----------------------------------------|----------------------|
| SAMN28592158 | G00009_1C   | Blood                                  | PRJNA727021          |
| SAMN28592134 | G00009_30   | Nasopharyngeal swab                    | PRJNA727021          |
| SAMN28592087 | G00009_3B   | Nasopharyngeal and Oropharyngeal Swabs | PRJNA727021          |
| SAMN28592159 | G00014_1C   | Blood                                  | PRJNA727021          |
| SAMN28592099 | G00014_4A   | Induced Sputum                         | PRJNA727021          |
| SAMN28592112 | G00088_30   | Nasopharyngeal swab                    | PRJNA727021          |
| SAMN28592150 | G00088_90   | Lung aspirate                          | PRJNA727021          |
| SAMN28592135 | G00145_30   | Nasopharyngeal swab                    | PRJNA727021          |
| SAMN28592085 | G00145_36   | Nasopharyngeal and Oropharyngeal Swabs | PRJNA727021          |
| SAMN28592100 | G00145_4A   | Induced Sputum                         | PRJNA727021          |
| SAMN28592136 | G00182_30   | Nasopharyngeal swab                    | PRJNA727021          |
| SAMN28592101 | G00182_4A   | Induced Sputum                         | PRJNA727021          |
| SAMN28592113 | G00186_30   | Nasopharyngeal swab                    | PRJNA727021          |
| SAMN28592151 | G00186_90   | Lung aspirate                          | PRJNA727021          |
| SAMN28592152 | G00196_90   | Lung aspirate                          | PRJNA727021          |
| SAMN28592137 | G00215_30   | Nasopharyngeal swab                    | PRJNA727021          |
| SAMN28592083 | G00215_3B   | Nasopharyngeal and Oropharyngeal Swabs | PRJNA727021          |
| SAMN28592102 | G00215_4A   | Induced Sputum                         | PRJNA727021          |
| SAMN28592116 | G00248_30   | Nasopharyngeal swab                    | PRJNA727021          |
| SAMN28592153 | G00248_90   | Lung aspirate                          | PRJNA727021          |
| SAMN28592163 | G00253_18   | Blood                                  | PRJNA727021          |
| SAMN28592138 | G00253_30   | Nasopharyngeal swab                    | PRJNA727021          |
| SAMN28592082 | G00253_3B   | Nasopharyngeal and Oropharyngeal Swabs | PRJNA727021          |
| SAMN28592117 | G00266_30   | Nasopharyngeal swab                    | PRJNA727021          |
| SAMN28592154 | G00266_90   | Lung aspirate                          | PRJNA727021          |
| SAMN28592139 | G00268_30   | Nasopharyngeal swab                    | PRJNA727021          |
| SAMN28592103 | G00268_4A   | Induced Sputum                         | PRJNA727021          |
| SAMN28592118 | G00278_30   | Nasopharyngeal swab                    | PRJNA727021          |
| SAMN28592155 | G00278_90   | Lung aspirate                          | PRJNA727021          |
| SAMN28592120 | G00318_30   | Nasopharyngeal swab                    | PRJNA727021          |
| SAMN28592165 | G00342_1C   | Blood                                  | PRJNA727021          |
| SAMN28592080 | G00342_3B   | Nasopharyngeal and Oropharyngeal Swabs | PRJNA727021          |
| SAMN28592104 | G00342_4A   | Induced Sputum                         | PRJNA727021          |
| SAMN28592121 | G00353_30   | Nasopharyngeal swab                    | PRJNA727021          |
| SAMN28592157 | G00353_90   | Lung aspirate                          | PRJNA727021          |
| SAMN28592166 | G00411_17   | Blood                                  | PRJNA727021          |
| SAMN28592141 | G00411_30   | Nasopharyngeal swab                    | PRJNA727021          |
| SAMN28592122 | G00423_30   | Nasopharyngeal swab                    | PRJNA727021          |
| SAMN28592123 | G00467_30   | Nasopharyngeal swab                    | PRJNA727021          |
| SAMN28592167 | G00479_1C   | Blood                                  | PRJNA727021          |
| SAMN28592089 | G00479_3B   | Nasopharyngeal and Oropharyngeal Swabs | PRJNA727021          |
| SAMN28592168 | G00509_1C   | Blood                                  | PRJNA727021          |
| SAMN28592143 | G00509_30   | Nasopharyngeal swab                    | PRJNA727021          |
| SAMN28592090 | G00509_3B   | Nasopharyngeal and Oropharyngeal Swabs | PRJNA727021          |

|              |           |                                        |             |
|--------------|-----------|----------------------------------------|-------------|
| SAMN28592106 | G00509_4A | Induced Sputum                         | PRJNA727021 |
| SAMN28592169 | G00605_1C | Blood                                  | PRJNA727021 |
| SAMN28592144 | G00605_30 | Nasopharyngeal swab                    | PRJNA727021 |
| SAMN28592107 | G00605_4A | Induced Sputum                         | PRJNA727021 |
| SAMN28592124 | G00633_30 | Nasopharyngeal swab                    | PRJNA727021 |
| SAMN28592125 | G00652_30 | Nasopharyngeal swab                    | PRJNA727021 |
| SAMN28592126 | G00660_30 | Nasopharyngeal swab                    | PRJNA727021 |
| SAMN28592092 | G00667_3B | Nasopharyngeal and Oropharyngeal Swabs | PRJNA727021 |
| SAMN28592171 | G00680_1C | Blood                                  | PRJNA727021 |
| SAMN28592093 | G00680_3B | Nasopharyngeal and Oropharyngeal Swabs | PRJNA727021 |
| SAMN28592127 | G00749_30 | Nasopharyngeal swab                    | PRJNA727021 |
| SAMN28592128 | G00774_30 | Nasopharyngeal swab                    | PRJNA727021 |
| SAMN28592172 | G00789_17 | Blood                                  | PRJNA727021 |
| SAMN28592147 | G00789_30 | Nasopharyngeal swab                    | PRJNA727021 |
| SAMN28592108 | G00789_4A | Induced Sputum                         | PRJNA727021 |
| SAMN28592129 | G00866_30 | Nasopharyngeal swab                    | PRJNA727021 |
| SAMN28592095 | G00973_3B | Nasopharyngeal and Oropharyngeal Swabs | PRJNA727021 |
| SAMN28592109 | G00973_4A | Induced Sputum                         | PRJNA727021 |
| SAMN28592131 | G01021_30 | Nasopharyngeal swab                    | PRJNA727021 |
| SAMN28592174 | G01032_18 | Blood                                  | PRJNA727021 |
| SAMN28592149 | G01032_30 | Nasopharyngeal swab                    | PRJNA727021 |
| SAMN28592096 | G01032_36 | Nasopharyngeal and Oropharyngeal Swabs | PRJNA727021 |
| SAMN28592110 | G01032_4A | Induced Sputum                         | PRJNA727021 |
| SAMN28592097 | G01038_37 | Nasopharyngeal and Oropharyngeal Swabs | PRJNA727021 |
| SAMN28592111 | G01038_4A | Induced Sputum                         | PRJNA727021 |
| SAMN28592132 | G01175_30 | Nasopharyngeal swab                    | PRJNA727021 |
| SAMN28592133 | G01180_30 | Nasopharyngeal swab                    | PRJNA727021 |
